# Supplementary material for: Conserved effector families render Phytophthora species vulnerable to recognition by NLR receptors in nonhost plants
Source: PubMed Central journal article supplement — Nat Commun. 2024 Nov 20;15:10070. doi: 10.1038/s41467-024-54452-2 (PMC11579510; doi:10.1038/s41467-024-54452-2), 2024-11-20
Supplement: 41467_2024_54452_MOESM1_ESM.pdf [file 41467_2024_54452_MOESM1_ESM.pdf]

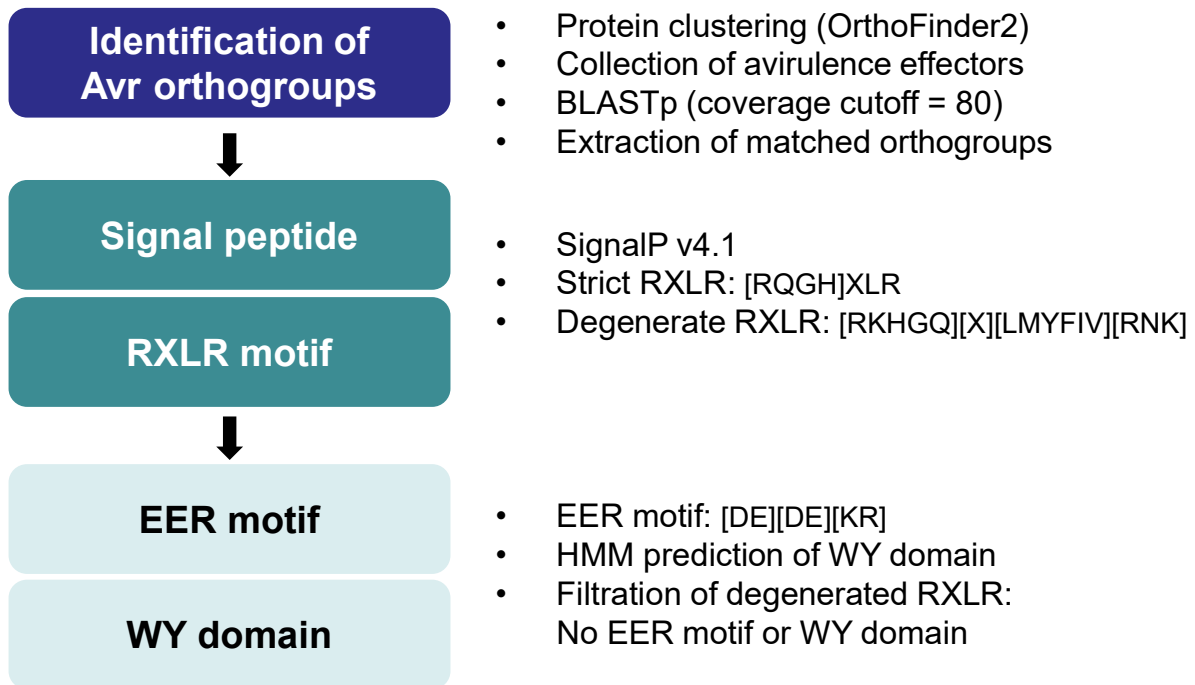

**Supplementary Figure 1.** Pipeline for identifying and clustering *Phytophthora* effector families with homology to reference avirulence effectors

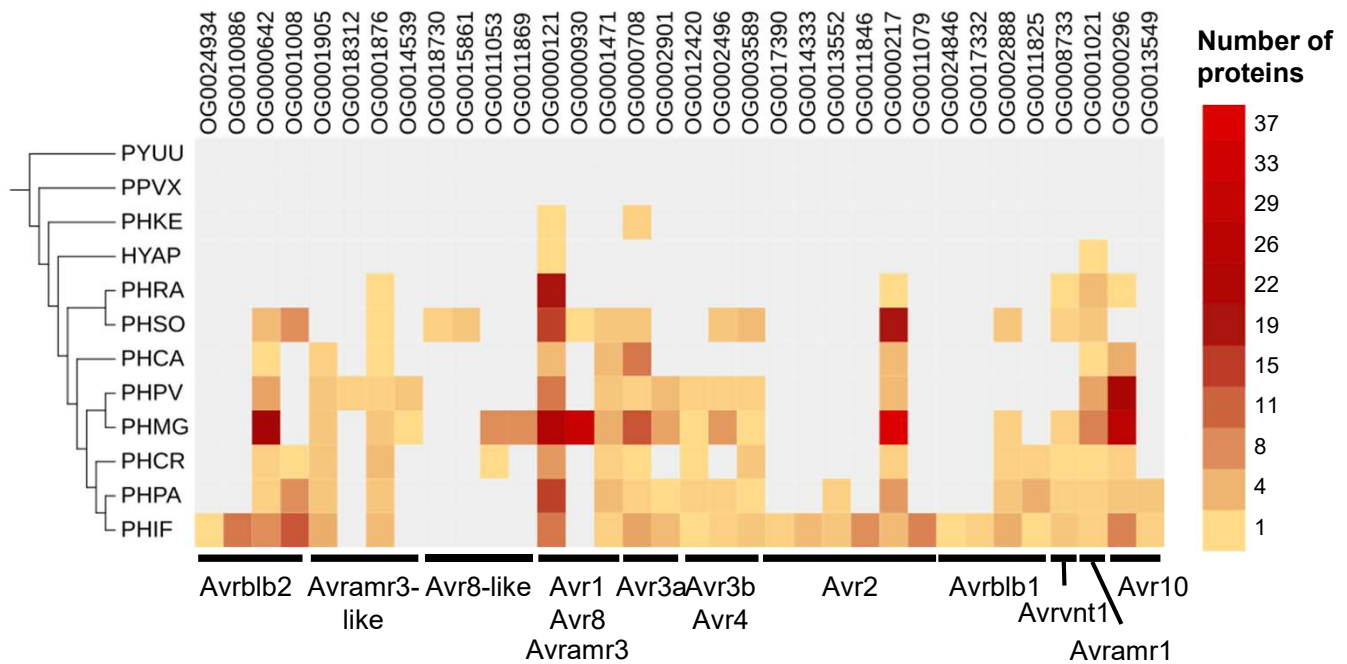

**Supplementary Figure 2.** Multiple effector families defined by orthogroup clustering are conserved within *Phytophthora* species. For each reference avirulence effector, an orthogroup with an effector with coverage above 80% is marked as the corresponding effector group. Light gray indicates absence of homologous effector. Abbreviations of species names are described in Supplementary Table 2.

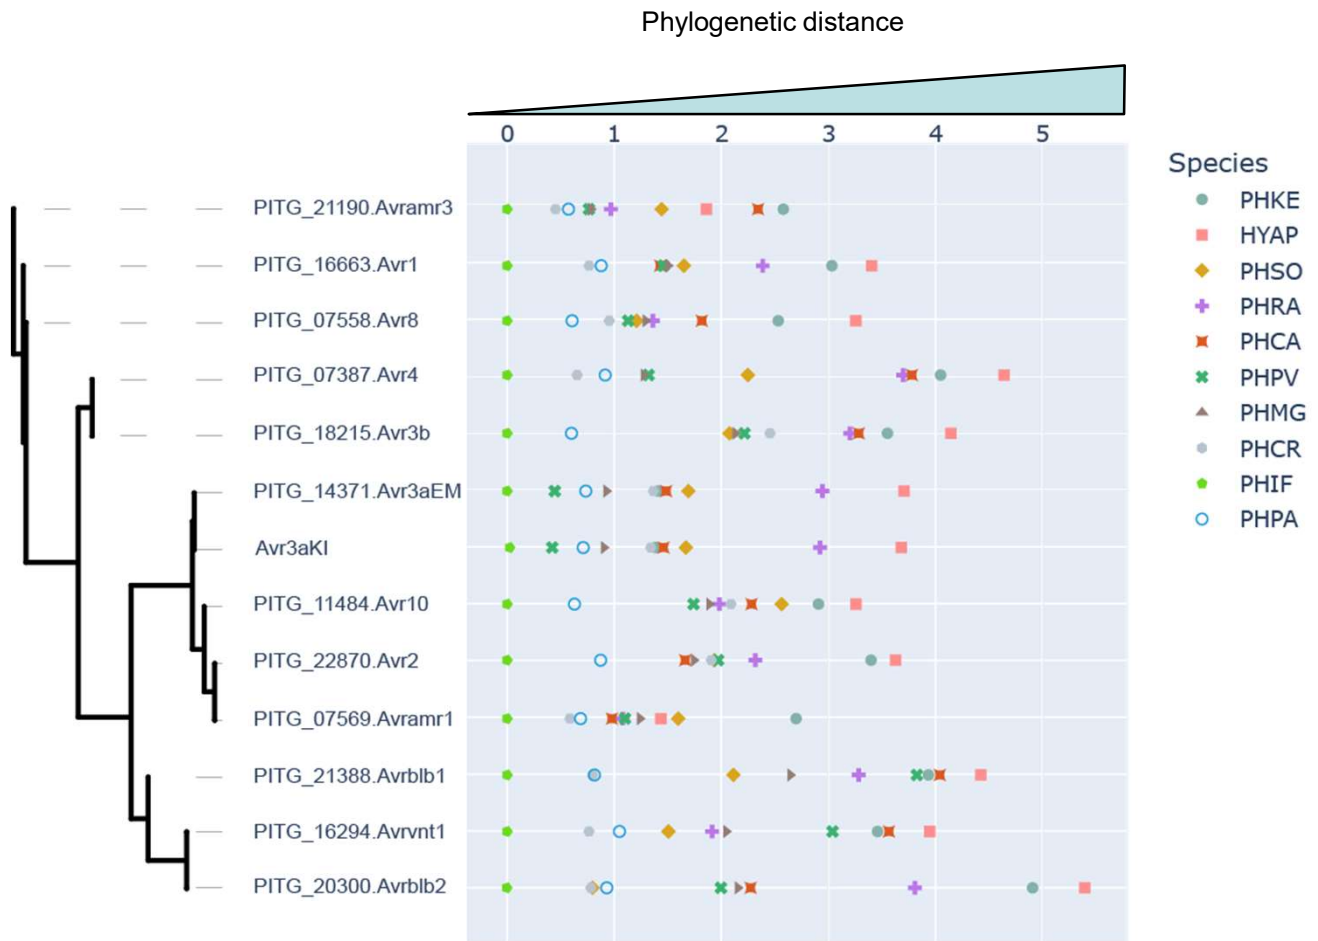

**Supplementary Figure 3.** *Avr1*, *Avr3a*, *Avr8*, *Avramr1*, and *Avramr3* are conserved within *Phytophthora* species. The phylogenetic (patristic) distance between reference avirulence effector in *P. infestans* and the closest homolog in the other *Phytophthora* species were calculated from the phylogenetic tree in Fig. 1c, as previously described in Harant et al. (2022).

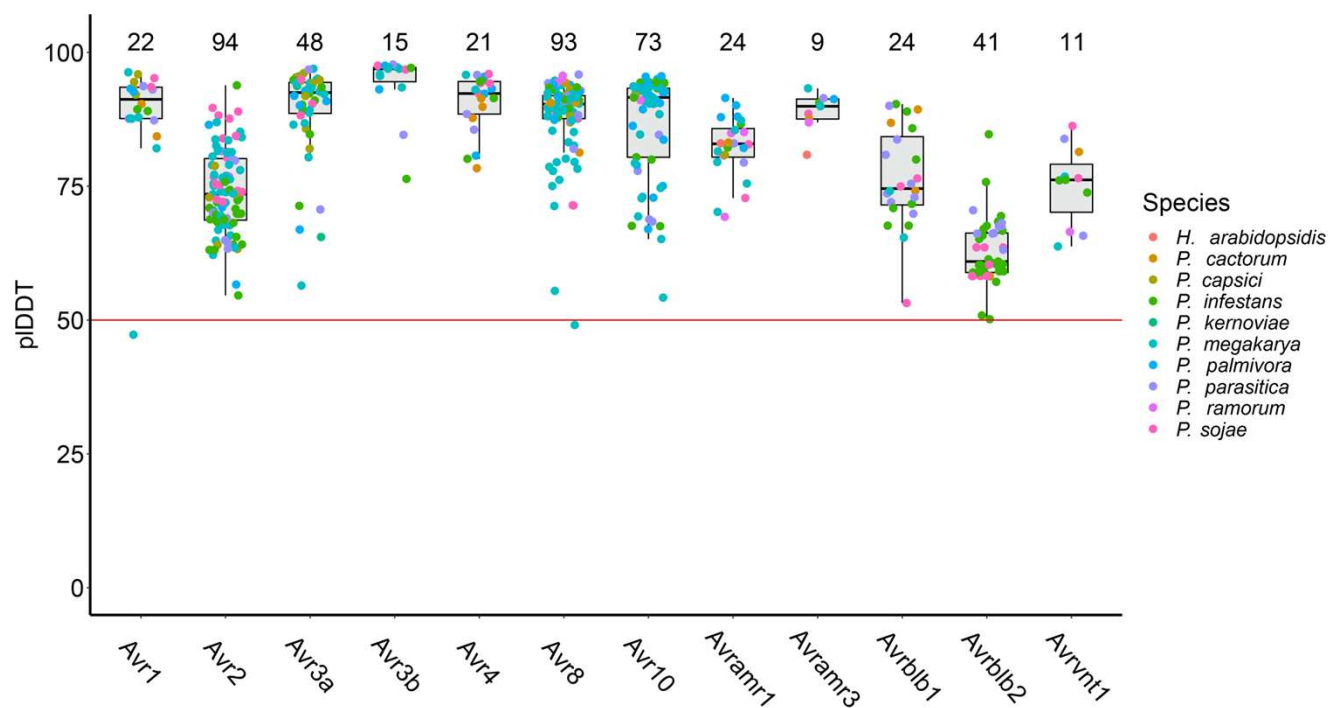

**Supplementary Figure 4.** Evaluation of structural predictions of effector domain regions. The numbers at the top of the figure show the number of predicted structures for each avirulence effector. The red horizontal line represents the pIDDT score cutoff for the effector structure to be used for downstream analysis.

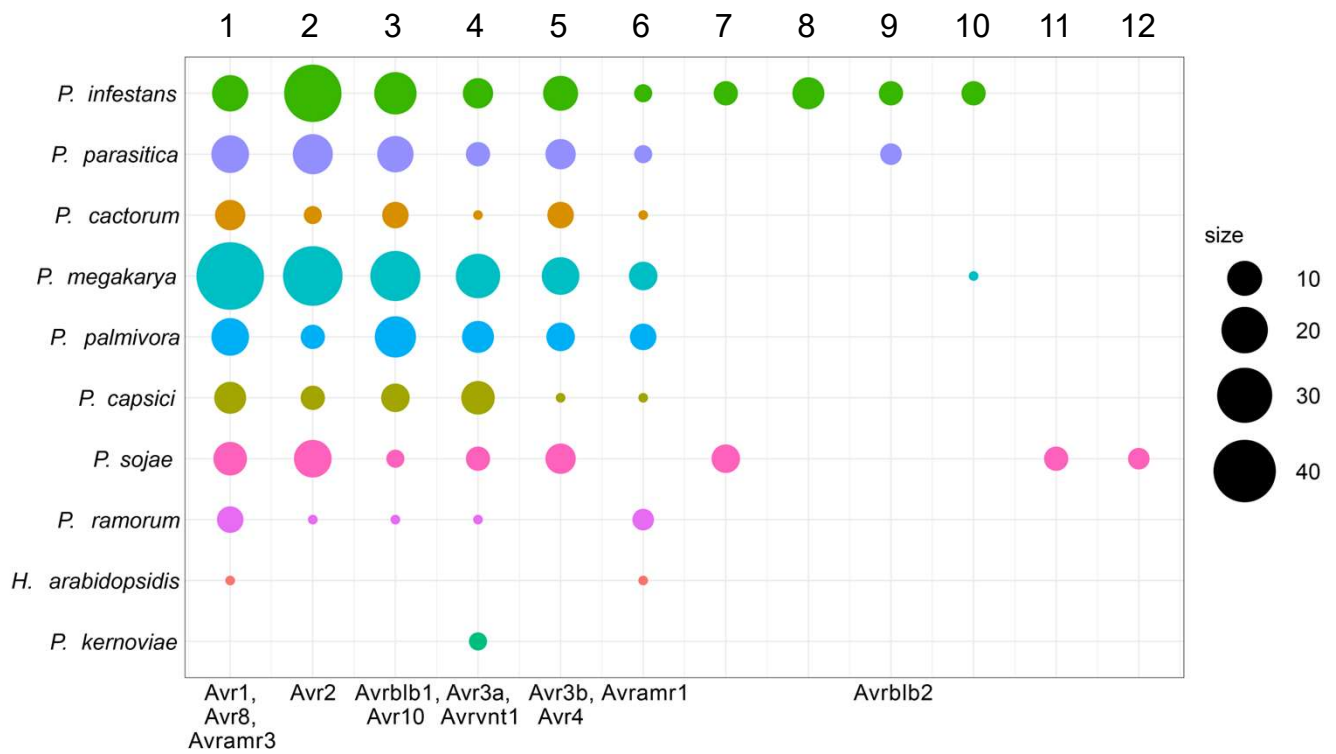

**Supplementary Figure 5.** Structure-based clustering of avirulence effector homologs. The numbers at the top of the figure represent the cluster number. The reference avirulence effector included in each cluster is indicated at the bottom of the figure.

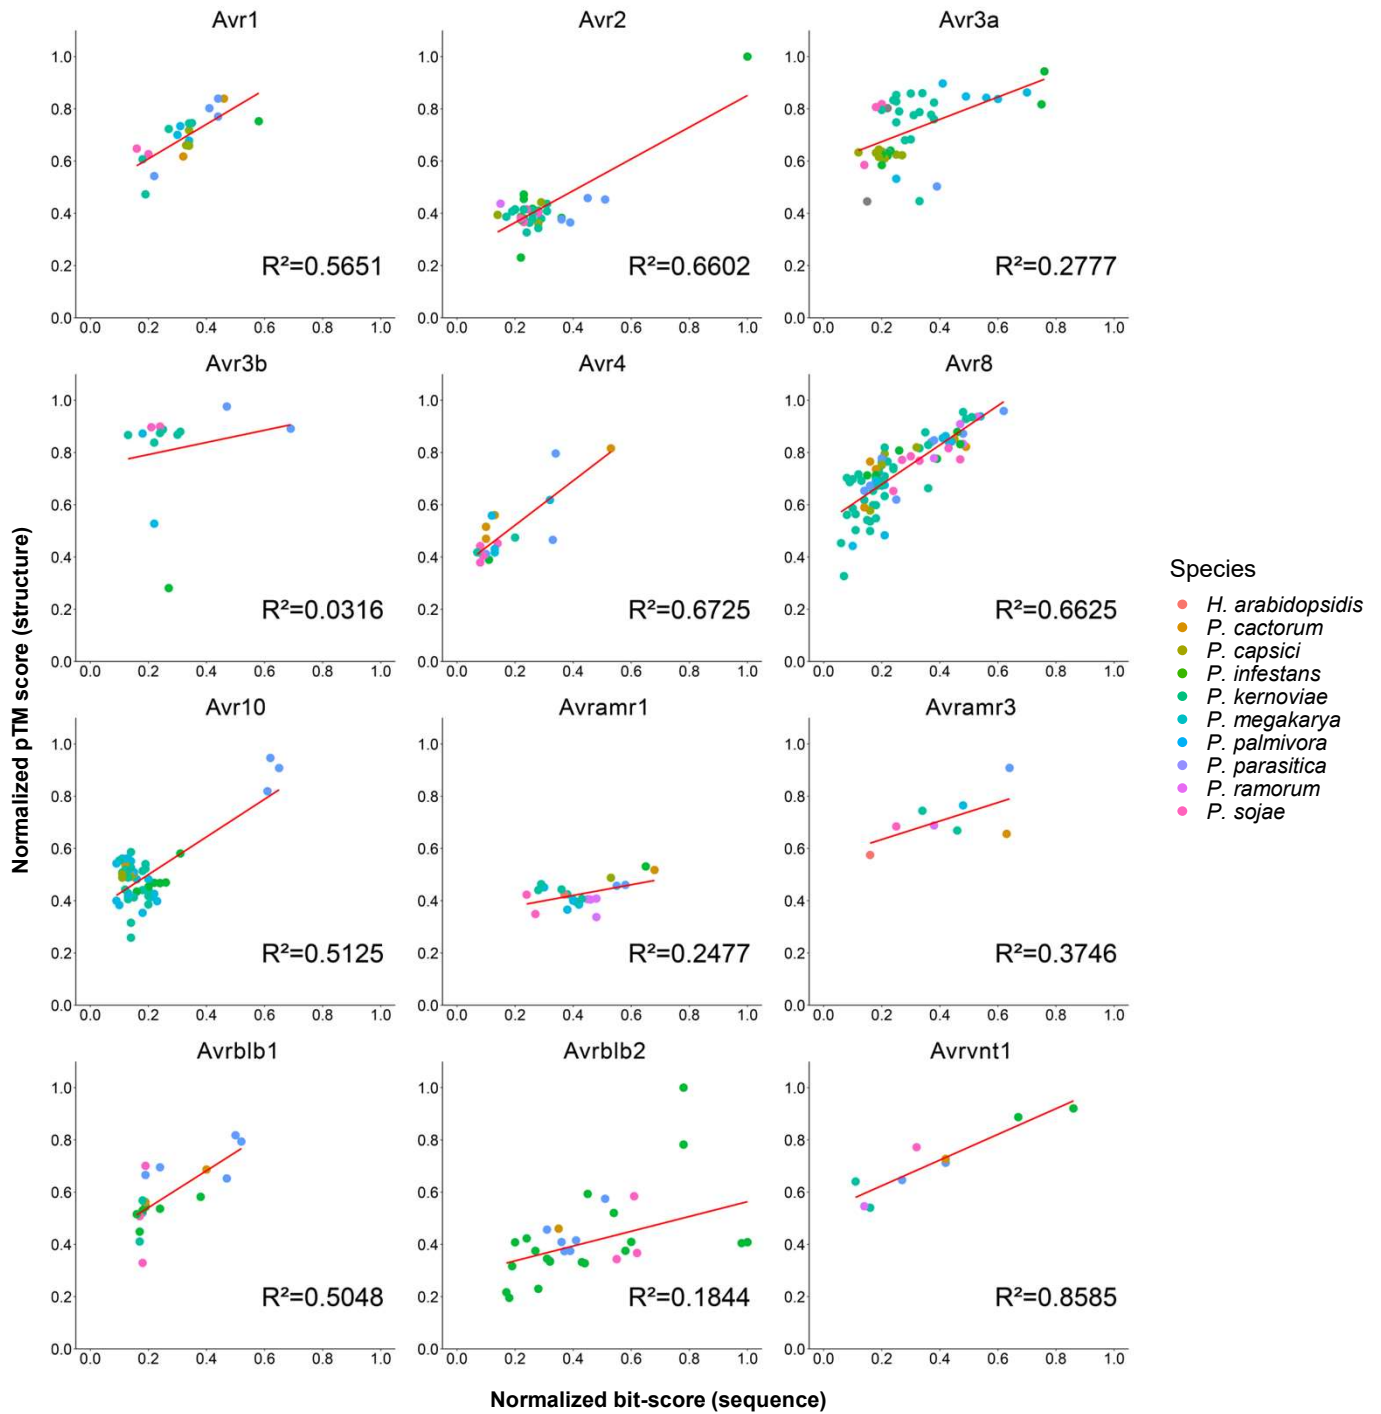

**Supplementary Figure 6.** Conservation ratio of protein sequence and structure for each effector homologs. The red line and  $R^2$  value represent the Pearson correlation coefficient between normalized bit-score and normalized pTM score.

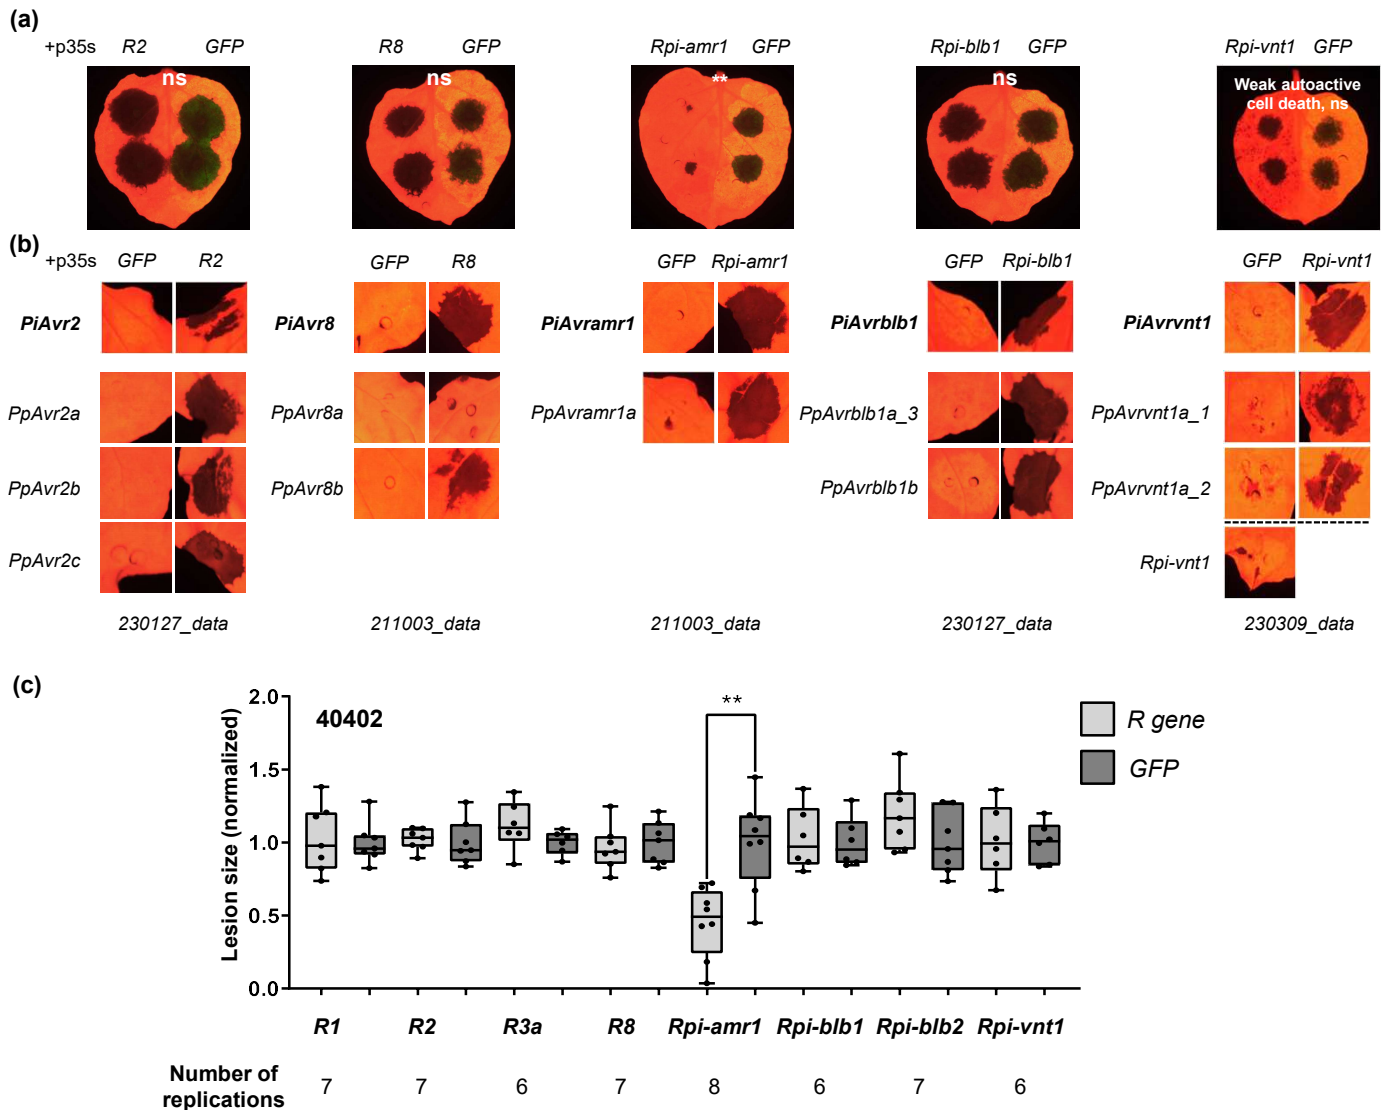

**Supplementary Figure 7. Solanum NLRs recognizing PiAVR effectors also recognize *P. parasitica* homologs**

**(a)** Representative images of lesion of *P. parasitica* (40402 strain) inoculated on *Solanum* NLR-expressed half compared to the *GFP*-expressed area of *N. benthamiana* leaves (ns: not significant). Expression of *Rpi-vnt1* induced weak cell death phenotype at 2 dpi on the infiltrated region of leaves (black spots). **(b)** Eight *Solanum* NLRs (*R1*, *R3a*, and *Rpi-blb2* are not presented cause they cannot induced cell death against *PpAVR* candidates) were co-expressed with their putative corresponding effectors of *P. parasitica* in *N. benthamiana* leaves. Representative image of positive cases are presented. **(c)** Average lesion size are presented with box plot. Total 8 *Solanum* NLRs were tested for resistance assay against *P. parasitica*. Expression of *Rpi-amr1* significantly reduced lesion size compared to *GFP*-expressed region of *N. benthamiana* leaves. Statistically significances were analyzed with unpaired *t*-test (\*\* $P < 0.01$ ).

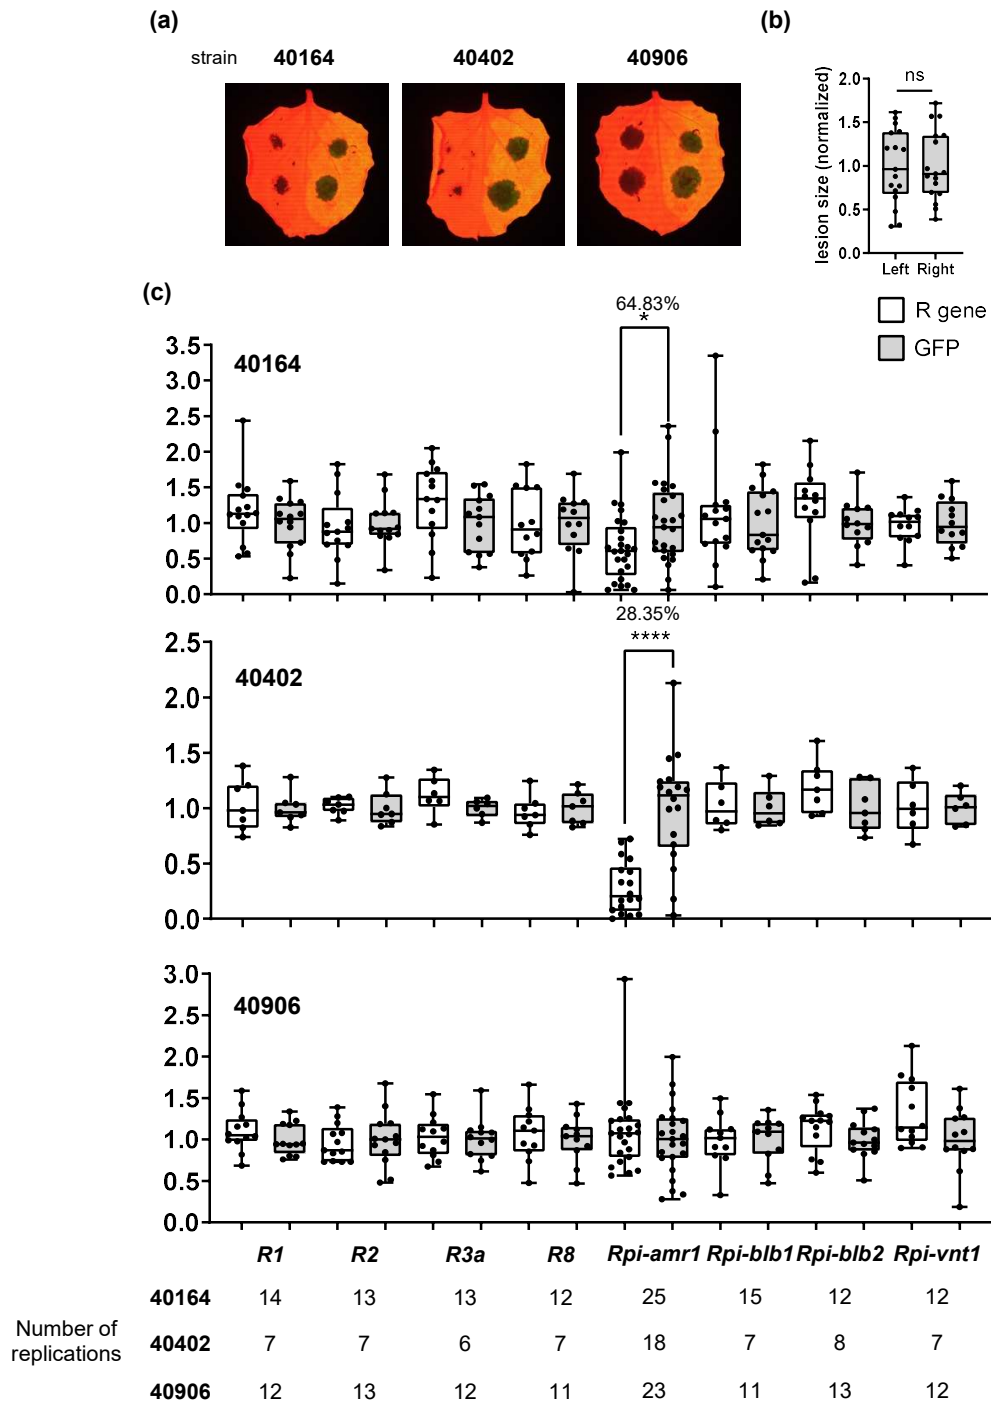

### Supplementary Figure 8. *P. parasitica* strains exhibited different phenotypes against *Rpi-amr1* expression

(a) Representative images of lesion of *P. parasitica* (40164, 40402, and 40906 strains) inoculated on *Rpi-amr1*-expressed half compared to the *GFP*-expressed area of *N. benthamiana* leaves. (b) Average lesion size of *P. parasitica* inoculated on *GFP*-expressed left and right half of *N. benthamiana* leaves were statistically similar (ns: not significant). This result indicate that our inoculation method and environment conditions were even for each cases. (c) Average lesion size are presented with box plot. Total 8 *Solanum* NLRs were tested for resistance assay against *P. parasitica*. Expression of *Rpi-amr1* significantly reduced lesion size of *P. parasitica* 40164 and 40402 strains compared to *GFP*-expressed region of *N. benthamiana* leaves, but it was not working against 40906 strain. Statistically significances were analyzed with unpaired *t*-test (\* $P < 0.05$ ; \*\*\*\* $P < 0.0001$ ).



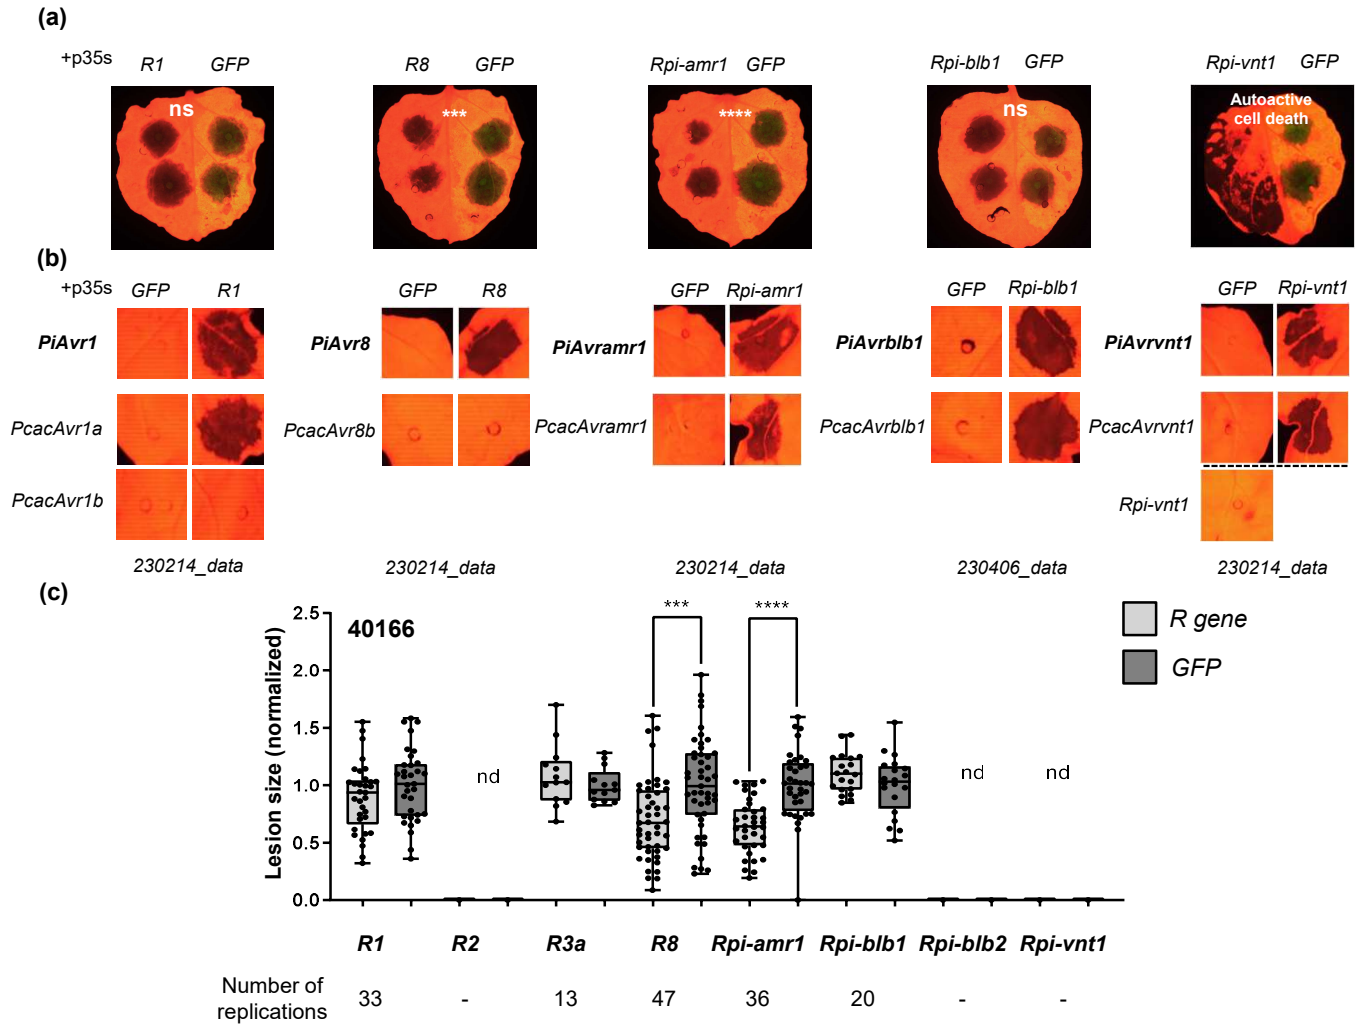

**Supplementary Figure 9. Solanum NLRs recognizing PiAVR effectors also recognize *P. cactorum* homologs**

**(a)** Representative images of lesion of *P. cactorum* (40166 strain) inoculated on *Solanum* NLR-expressed half compared to the *GFP*-expressed area of *N. benthamiana* leaves (ns: not significant; nd: non-determined). Expression of *Rpi-vnt1* induced intensive cell death phenotype at 2.5 dpi on the infiltrated region of leaves (left half of leaf in the picture). **(b)** Five *Solanum* NLRs were co-expressed with their putative corresponding effectors of *P. cactorum* in *N. benthamiana* leaves. Representative image of positive cases are presented. **(c)** Average lesion size are presented with box plot. Total 5 *Solanum* NLRs (*Rpi-vnt1* was excluded due to auto-active cell death phenotype started from 2 dpi) were tested for resistance assay against *P. cactorum*. Expression of R8 and *Rpi-amr1* significantly reduced lesion size compared to *GFP*-expressed region of *N. benthamiana* leaves. Statistical significances were analyzed with unpaired *t*-test (\*\**P*<0.001; \*\*\*\**P*<0.0001; nd: non-determined).

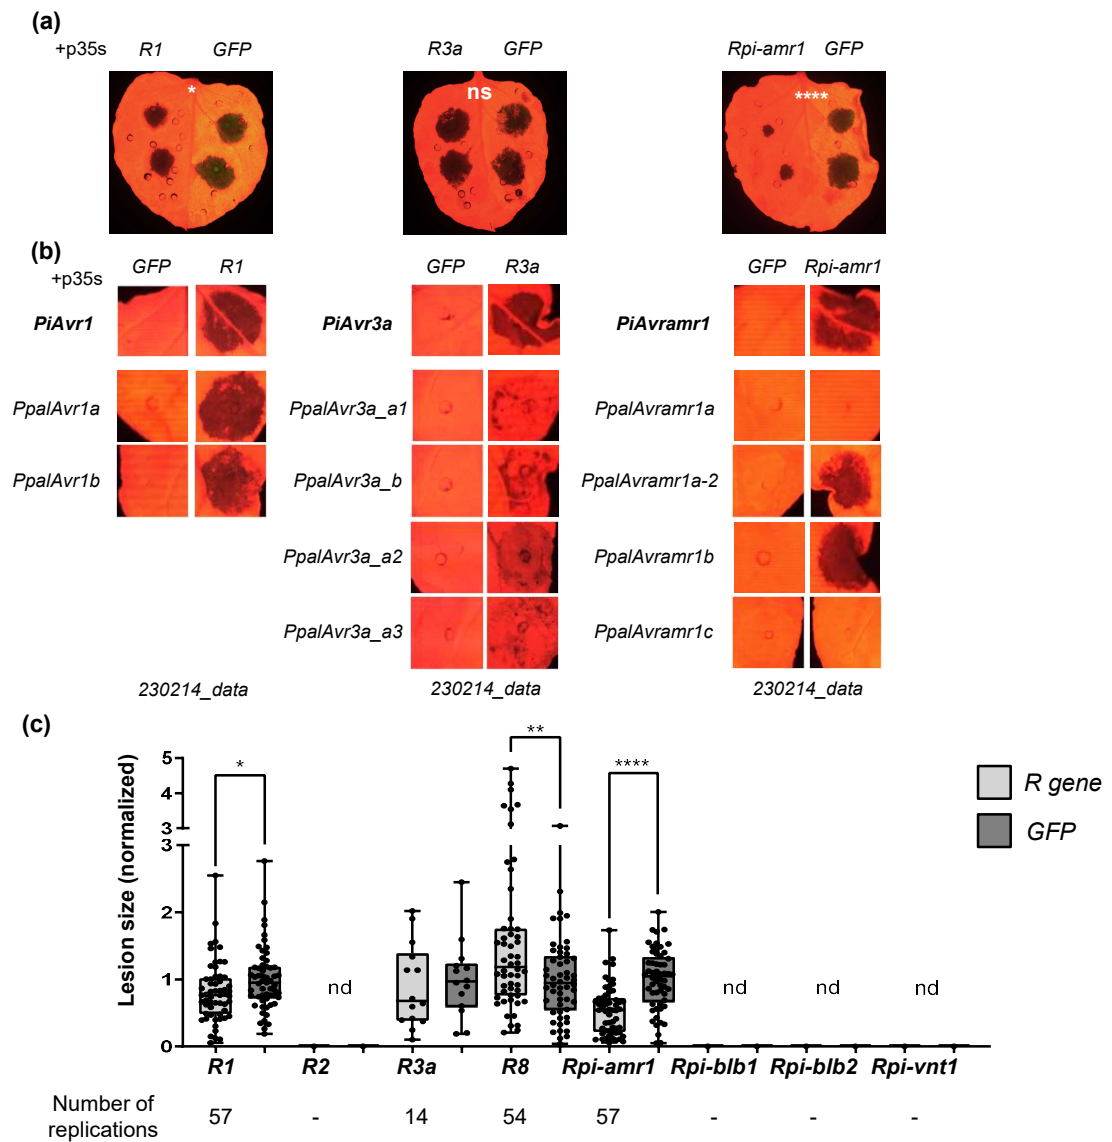

**Supplementary Figure 10. Solanum NLRs recognizing PiAVR effectors also recognize *P. palmivora* homologs**

**(a)** Representative images of lesion of *P. palmivora* (40410 strain) inoculated on *Solanum* NLR-expressed half compared to the *GFP*-expressed area of *N. benthamiana* leaves (ns: not significant). **(b)** Four *Solanum* NLRs (*R8* is not presented cause it cannot induced cell death against *PpalAVR* candidates) were co-expressed with their putative corresponding effectors of *P. palmivora* in *N. benthamiana* leaves. Representative image of positive cases are presented. **(c)** Average lesion size are presented with box plot. Total 4 *Solanum* NLRs were tested for resistance assay against *P. palmivora*. Expression of *R1* and *Rpi-amr1* significantly reduced lesion size compared to *GFP*-expressed region of *N. benthamiana* leaves. Statistical significances were analyzed with unpaired *t*-test (\* $P < 0.05$ ; \*\* $P < 0.01$ ; \*\*\*\* $P < 0.0001$ ; nd: non-determined).

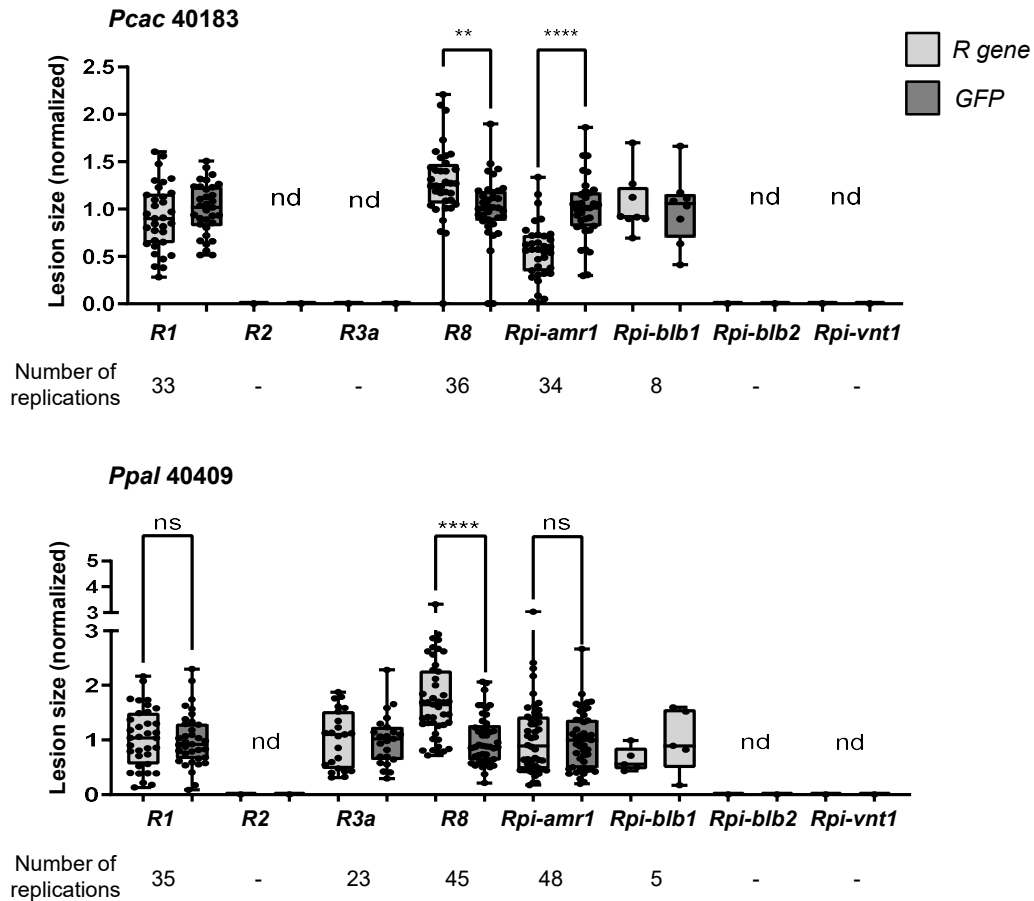

**Supplementary Figure 11.** *P. cactorum* and *P. palmivora* strains exhibited different phenotypes against expression of *R1*, *R8* or *Rpi-amr1*.

Average lesion size are presented with 10-90 percentile box plot. Total 4 and 5 *Solanum* NLRs were tested for resistance assay against *P. cactorum* and *P. palmivora*, respectively. Although expression of *R8* significantly reduced lesion size of *P. cactorum* 40166 strain, it was not working against 40183 strain. Similarly, while expression of *R1* significantly reduced lesion size of *P. palmivora* 40410 strain, it was not replicated against 40409 strain. Statistical significances were analyzed with unpaired *t*-test (\*\* $P < 0.01$ ; \*\* $P < 0.01$ ; \*\*\*\* $P < 0.0001$ ; ns: not significant; nd: non-determined).

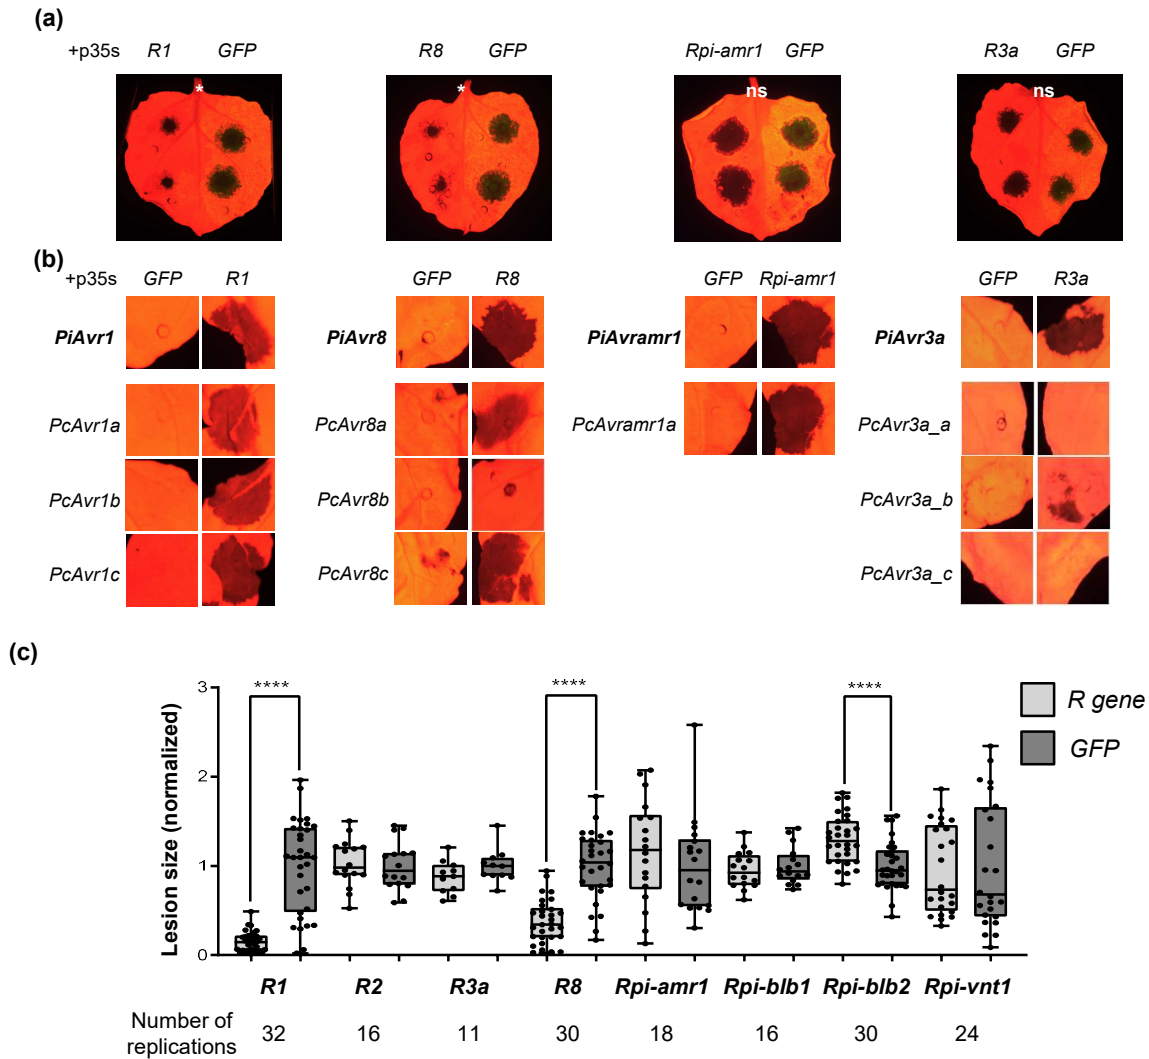

**Supplementary Figure 12. Solanum NLRs recognizing PiAVR effectors also recognize *P. capsici* homologs**

**(a)** Representative images of lesion of *P. capsici* (40476 strain) inoculated on *Solanum* NLR-expressed half compared to the *GFP*-expressed area of *N. benthamiana* leaves (ns: not significant). **(b)** Five *Solanum* NLRs (*R2* is not presented cause it cannot induced cell death against *PcAvr2* candidates) were co-expressed with their putative corresponding effectors of *P. capsici* in *N. benthamiana* leaves. Representative image of positive cases are presented. **(c)** Average lesion size are presented with 10-90 percentile box plot. Total 8 *Solanum* NLRs were tested for resistance assay against *P. capsici*. Expression of *R1* and *R8* significantly reduced lesion size compared to *GFP*-expressed region of *N. benthamiana* leaves. Statistical significances were analyzed with unpaired *t*-test (\*\*\*\* $P < 0.0001$ ).

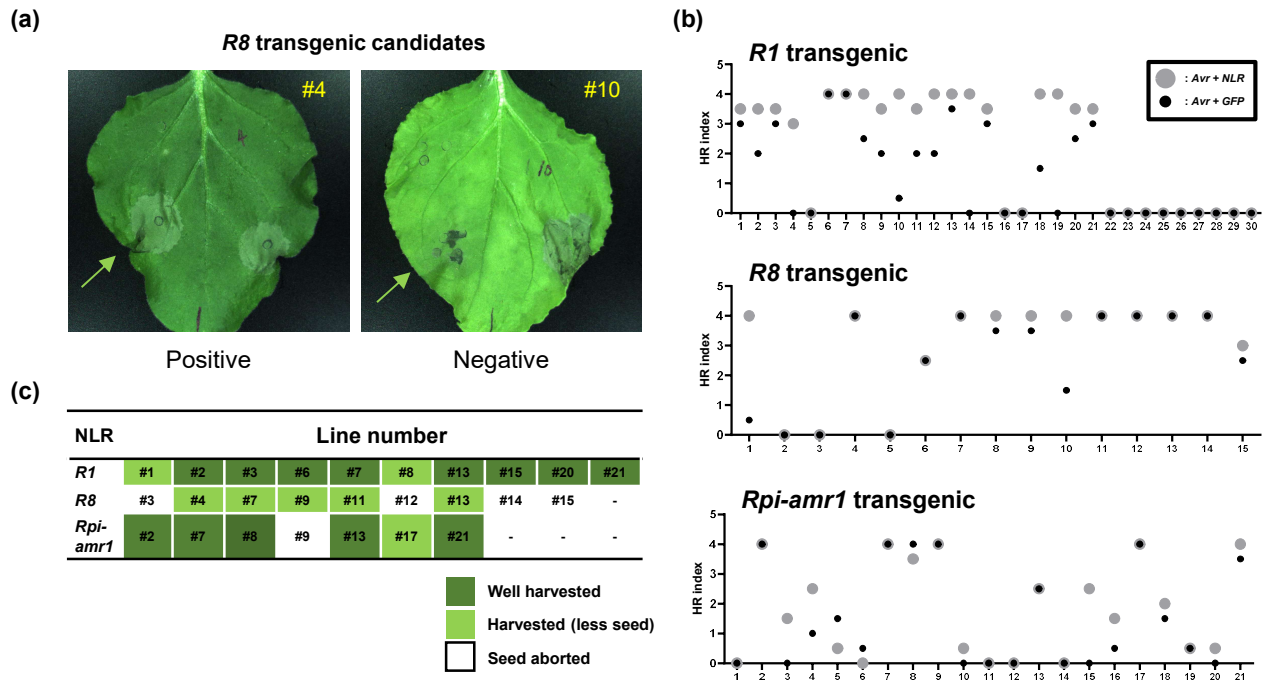

**Supplementary Figure 13.** HR phenotype screening of  $T_0$  transgenic *N. benthamiana*

**(a)** Representative images of positive and negative case of HR screening test. Expression of *Avr8* with *GFP* (left, marked with green arrow in picture) through the agroinfiltration triggered clear cell death response in  $T_0$  plant line #4, but not in line #10. *Avr8/R8* were co-expressed as a positive control. **(b)** Among the 30, 15, and 21  $T_0$  plant thought to express *R1*, *R8*, and *Rpi-amr1*, respectively, 10, 9, and 7 lines remain after the HR screening step.  $T_1$  seeds were harvested from 6~9 months old *N. benthamiana*. **(c)** Cell death intensity against corresponding avirulence effector of *P. infestans* in candidate plants thought as expressing *R1*, *R8*, or *Rpi-amr1* is presented as dot blot.

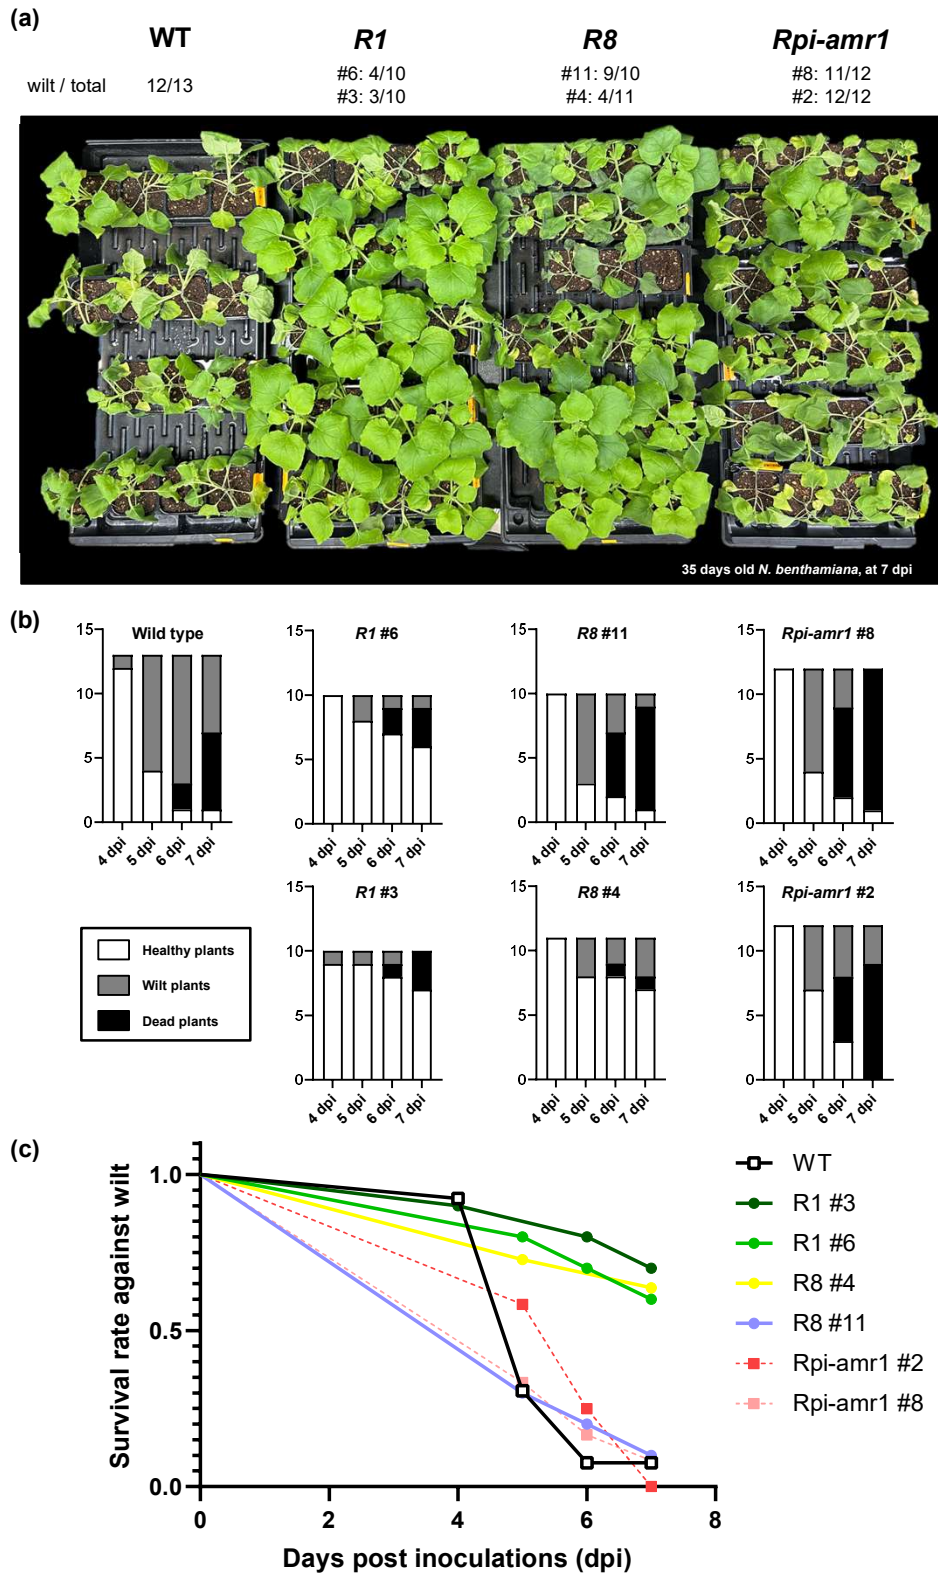

**Supplementary Figure 14.**  $T_1$  plants expressing *R1* or *R8* were resistant against root infection of *P. capsici* (1<sup>st</sup> trial).

**(a)** Picture of root inoculated plants (wild type, *R1*, *R8*, and *Rpi-amr1* transgenic *N. benthamiana*, 35 days old) at 7 days post inoculation. Each plant is inoculated with zoospores of *P. capsici*. *R1* (#3 and #6) and *R8* (#4) plants exhibited resistance phenotypes while WT and *Rpi-amr1* transgenic plants were completely wilt and shrivel. The number of wilt/total plants is presented as fraction above each plant line. **(b)** The number of healthy, wilt, and dead plants are presented as bar graph. Approximately 30% of *R1* (#3 and #6) and *R8* (#4) plants were also exhibited wilt phenotypes due to heterogeneity of  $T_1$  plants. **(c)** The ratio of healthy/total plants of each line is presented as line graph. Approximately 30% of *R1* (#3 and #6) and *R8* (#4) plants were also exhibited wilt phenotypes due to heterogeneity of  $T_1$  plants.

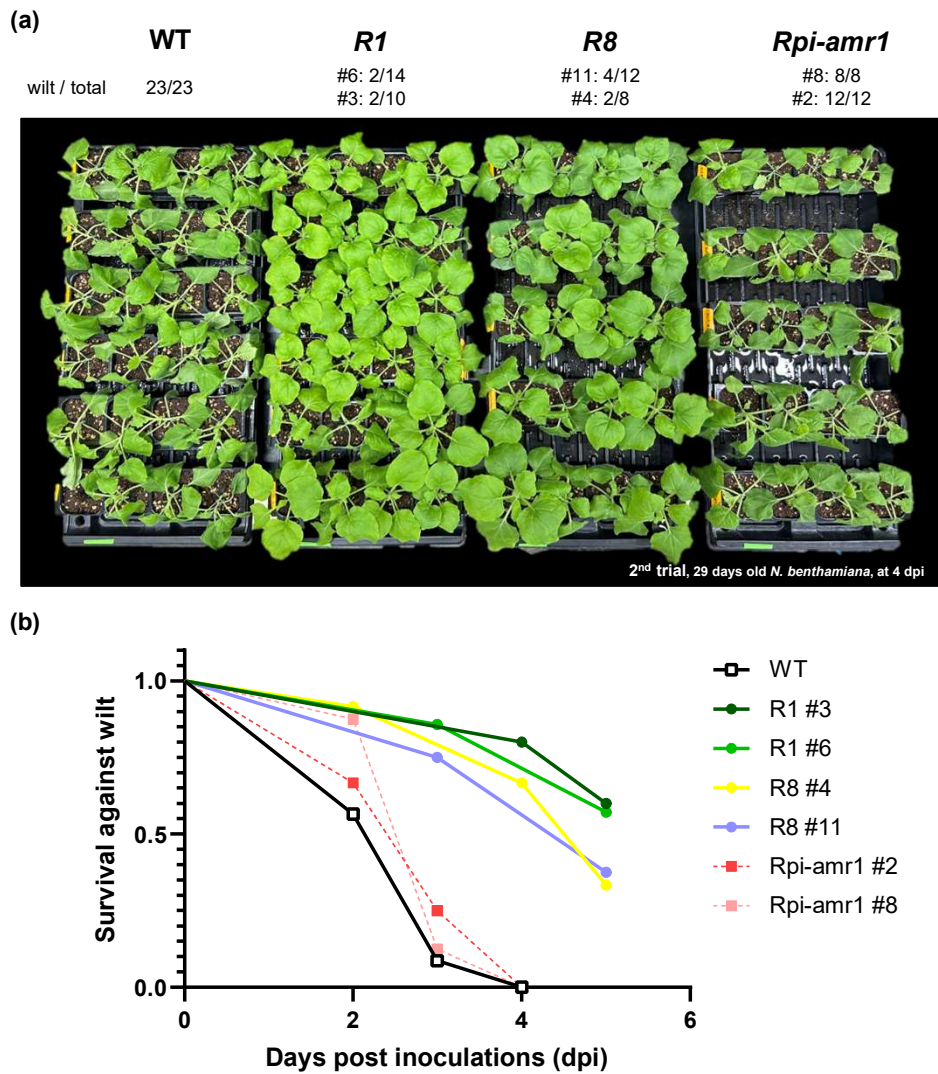

**Supplementary Figure 15.** T<sub>1</sub> plants expressing *R1* or *R8* were resistant against root infection of *P. capsici* (2<sup>nd</sup> trial).

(a) Picture of root inoculated plants (wild type, *R1*, *R8*, and *Rpi-amr1* transgenic *N. benthamiana*, 29 days old) at 4 days post inoculation. Each plant is inoculated with zoospores of *P. capsici*. *R1* (#3 and #6) and *R8* (#4 and #11) plants exhibited resistance phenotypes while WT and *Rpi-amr1* transgenic plants were completely wilt and shrivel. The number of wilt/total plants is presented as fraction above each plant line. (b) The ratio of healthy/total plants of each line is presented as line graph. Approximately 30% of *R1* (#3 and #6) and 50% *R8* (#4 and #11) plants were also exhibited wilt phenotypes.

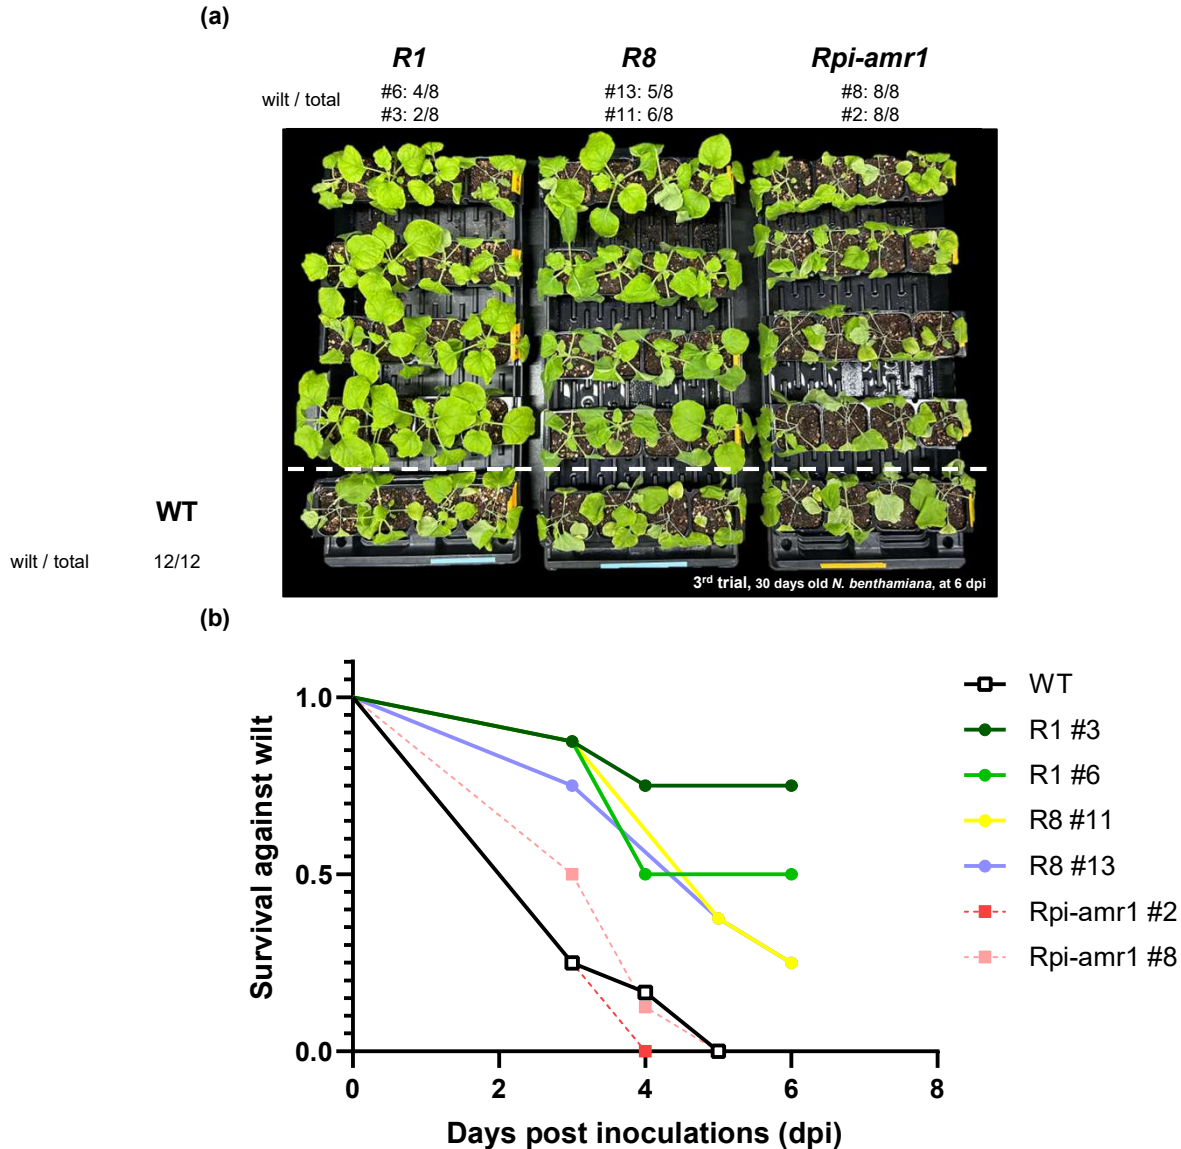

**Supplementary Figure 16.** T<sub>1</sub> plants expressing *R1* or *R8* were resistant against root infection of *P. capsici* (3<sup>rd</sup> trial).

(a) Picture of root inoculated plants (wild type, *R1*, *R8*, and *Rpi-amr1* transgenic *N. benthamiana*, 30 days old) at 6 days post inoculation. Each plant is inoculated with zoospores of *P. capsici*. *R1* (#3 and #6) and *R8* (#11 and #13) plants exhibited resistance phenotypes (*R8* exhibited relatively less intensive resistance) while WT and *Rpi-amr1* transgenic plants were completely wilt and shrivel. The number of wilt/total plants is presented as fraction above each plant line. (b) The ratio of healthy/total plants of each line is presented as line graph. Approximately 30% of *R1* (#3 and #6) and 70% *R8* (#11 and #13) plants were also exhibited wilt phenotypes.



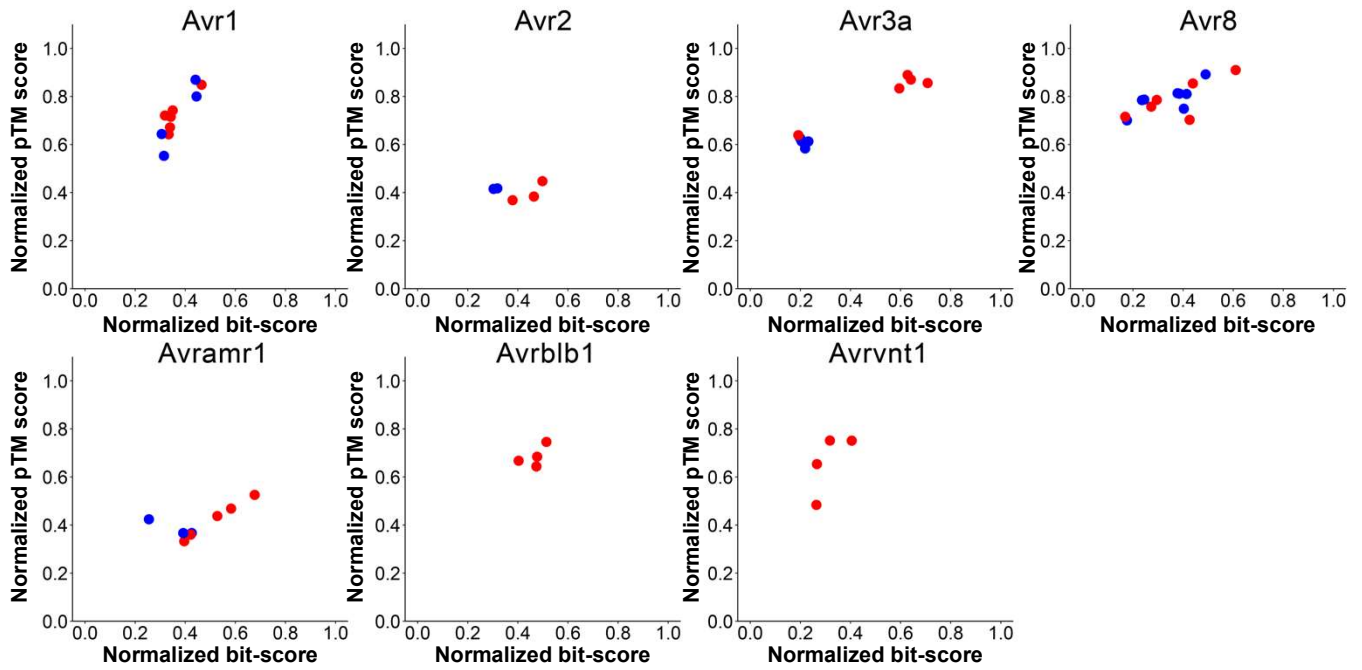

**Supplementary Figure 17.** Conservation ratio of protein sequence and structure for each cloned effector homologs. Red and blue dots represent HR-positive and HR-negative, respectively.

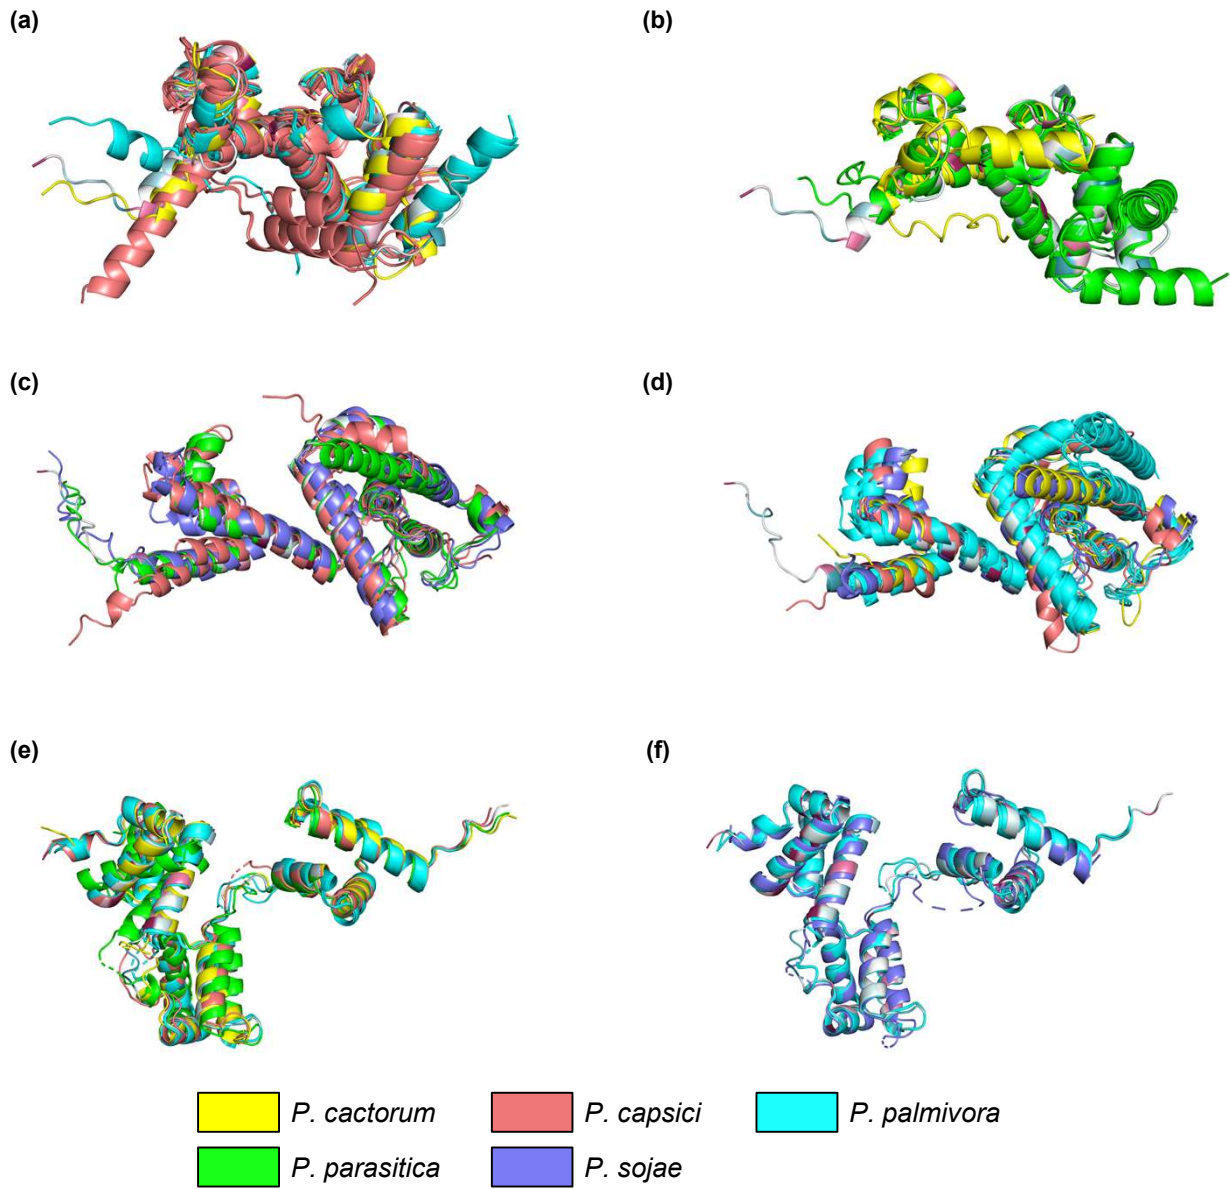

**Supplementary Figure 18.** Comparison of protein structures of HR-positive and HR-negative effectors. HR-positive (a, c, e) and HR-negative (b, d, f) effectors are compared against the reference avirulence effectors PiAvr1 (a-b), PiAvr8 (c-d), and PiAvramr1 (e-f), respectively. Effector homologs of one species are shown in the same color.



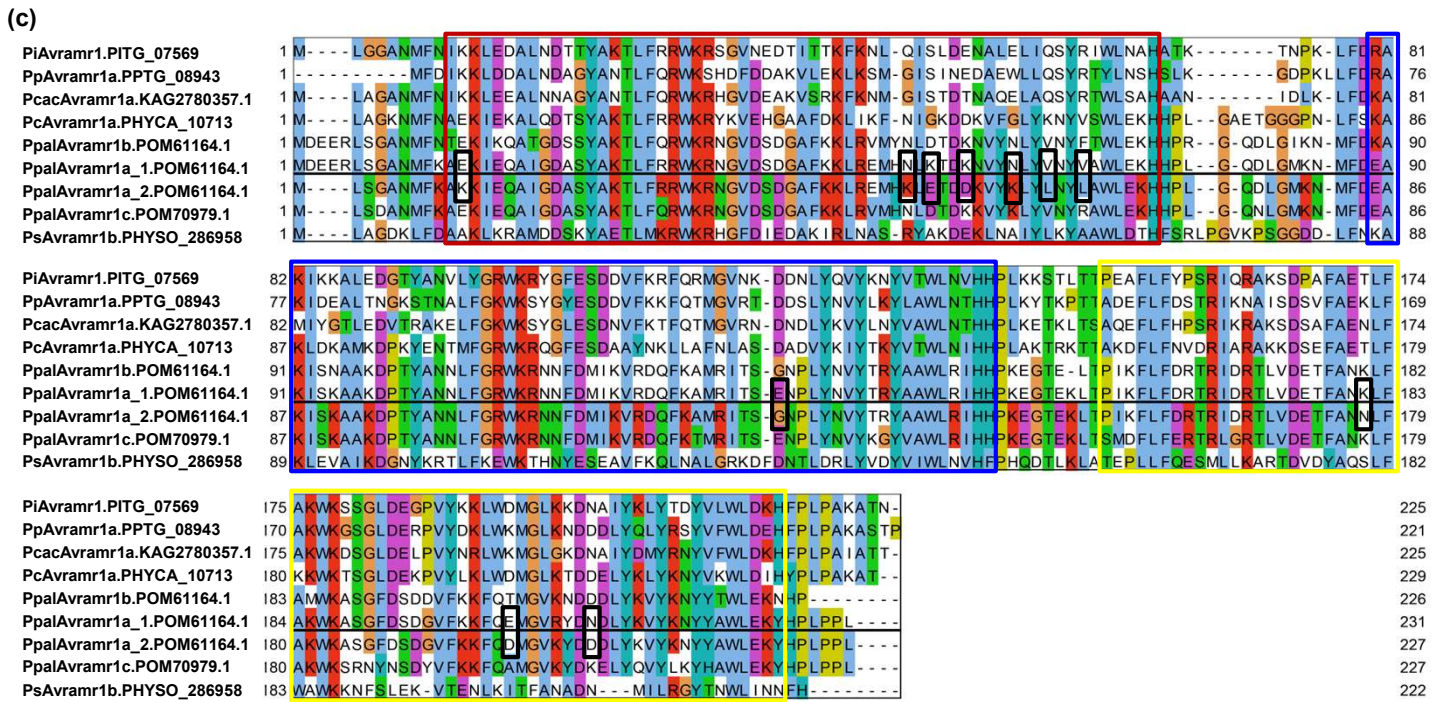

**Supplementary Figure 19.** Sequence alignments of cloned effector domain for HR-positive and HR-negative effectors in a) Avr1 b) Avr8 c) Avramr1. The top and bottom of the thick solid lines represent HR-positive and HR-negative effectors, respectively. Sequences are colored according to amino acid properties defined in the Clustal X color scheme implemented in Jalview. Red, blue, and yellow boxes indicate each WY domain region, and black boxes indicate sequences that differently conserved between HR positive and negative.

**Supplementary Table 1.** List of avirulence effectors used in this study

| Name    | PITG locus tag | UniprotID (Swiss-Prot) |
|---------|----------------|------------------------|
| Avr1    | PITG_16663     | sp_D0NVB5_AVR1_PHYIT   |
| Avr2    | PITG_22870     |                        |
| Avr3aEM | PITG_14371     | sp_D0NPN8_A3AEM_PHYIT  |
| Avr3aKI | PITG_14371     | sp_E2DWQ7_A3AKI_PHYIN  |
| Avr3b   | PITG_18215     | sp_D0NXM3_SF17_PHYIT   |
| Avr4    | PITG_07387     | sp_B1NNT7_AVR4_PHYIT   |
| Avr8    | PITG_07558     |                        |
| Avr10   | PITG_11484     | sp_D0NIW0_AVR10_PHYIT  |
| Avramr1 | PITG_07569     |                        |
| Avramr3 | PITG_21190     |                        |
| Avrblb1 | PITG_21388     | sp_D0P3S7_ABLB1_PHYIT  |
| Avrblb2 | PITG_04085     |                        |
| Avrblb2 | PITG_04086     |                        |
| Avrblb2 | PITG_04090     |                        |
| Avrblb2 | PITG_18683     | sp_D0NZB7_BLB2B_PHYIT  |
| Avrblb2 | PITG_20300     | sp_D0P1A8_ABLB2_PHYIT  |
| Avrblb2 | PITG_20301     |                        |
| Avrblb2 | PITG_20303     | sp_D0P1B2_SF18_PHYIT   |
| Avrvnt1 | PITG_16294     | sp_D0NTY1_AVNT1_PHYIT  |

**Supplementary Table 2.** The number of homologous effectors in selected species

| <b>Species</b>                        | <b>Prefix</b> | <b>Reported host plants</b>        | <b>Homologous RXLR effectors</b> | <b>Database</b> | <b>Download URL</b>                                                                                                                       |
|---------------------------------------|---------------|------------------------------------|----------------------------------|-----------------|-------------------------------------------------------------------------------------------------------------------------------------------|
| <i>Phytophthora infestans</i>         | PHIF          | Potato, tomato                     | 124                              | OGOBI           | <a href="https://ogob.ie/v1/gob/data.html">https://ogob.ie/v1/gob/data.html</a>                                                           |
| <i>Phytophthora parasitica</i>        | PHPA          | Potato, egg plant, pepper, tobacco | 70                               | OGOBI           | <a href="https://ogob.ie/v1/gob/data.html">https://ogob.ie/v1/gob/data.html</a>                                                           |
| <i>Phytophthora cactorum</i>          | PHCR          | Strawberry                         | 35                               | NCBI            | <a href="https://www.ncbi.nlm.nih.gov/datasets/genome/GCA_016864655.1/">https://www.ncbi.nlm.nih.gov/datasets/genome/GCA_016864655.1/</a> |
| <i>Phytophthora megakarya</i>         | PHMG          | Cocoa                              | 208                              | NCBI            | <a href="https://www.ncbi.nlm.nih.gov/datasets/genome/GCA_002215365.1/">https://www.ncbi.nlm.nih.gov/datasets/genome/GCA_002215365.1/</a> |
| <i>Phytophthora palmivora</i>         | PHPV          | Phalaenopsis                       | 72                               | NCBI            | <a href="https://www.ncbi.nlm.nih.gov/datasets/genome/GCA_002911725.1/">https://www.ncbi.nlm.nih.gov/datasets/genome/GCA_002911725.1/</a> |
| <i>Phytophthora capsici</i>           | PHCA          | Pepper, pumpkin, cucumber          | 32                               | OGOBI           | <a href="https://ogob.ie/v1/gob/data.html">https://ogob.ie/v1/gob/data.html</a>                                                           |
| <i>Phytophthora sojae</i>             | PHSO          | Soybean                            | 74                               | OGOBI           | <a href="https://ogob.ie/v1/gob/data.html">https://ogob.ie/v1/gob/data.html</a>                                                           |
| <i>Phytophthora ramorum</i>           | PHRA          | Oak tree                           | 27                               | OGOBI           | <a href="https://ogob.ie/v1/gob/data.html">https://ogob.ie/v1/gob/data.html</a>                                                           |
| <i>Hyaloperonospora arabidopsidis</i> | HYAP          | Arabidopsis                        | 2                                | OGOBI           | <a href="https://ogob.ie/v1/gob/data.html">https://ogob.ie/v1/gob/data.html</a>                                                           |
| <i>Phytophthora kernoviae</i>         | PHKE          | Beech tree, Azalea                 | 3                                | OGOBI           | <a href="https://ogob.ie/v1/gob/data.html">https://ogob.ie/v1/gob/data.html</a>                                                           |
| <i>Phytophthora vexans</i>            | PPVX          | Citrus                             | 0                                | OGOBI           | <a href="https://ogob.ie/v1/gob/data.html">https://ogob.ie/v1/gob/data.html</a>                                                           |
| <i>Pythium ultimum</i>                | PYUU          | Corn, potato                       | 0                                | OGOBI           | <a href="https://ogob.ie/v1/gob/data.html">https://ogob.ie/v1/gob/data.html</a>                                                           |

**Supplementary Table 3.** *Phytophthora* strains used in the study

| <b>Species</b>                 | <b>Strain number</b> | <b>Host plant species</b> | <b>Reference<sup>a</sup></b>              |
|--------------------------------|----------------------|---------------------------|-------------------------------------------|
| <i>Phytophthora infestans</i>  | T30-4                | Potato                    | (Haas <i>et al.</i> , <i>Nature</i> 2009) |
| <i>Phytophthora parasitica</i> | 40164                | Potato                    | KACC                                      |
| <i>Phytophthora parasitica</i> | 40402                | Egg plant                 | KACC                                      |
| <i>Phytophthora parasitica</i> | 40906                | Tobacco                   | KACC                                      |
| <i>Phytophthora cactorum</i>   | 40166                | Apple tree                | KACC                                      |
| <i>Phytophthora cactorum</i>   | 40183                | Strawberry                | KACC                                      |
| <i>Phytophthora palmivora</i>  | 40409                | Cymbidium                 | KACC                                      |
| <i>Phytophthora palmivora</i>  | 40410                | Fig tree                  | KACC                                      |
| <i>Phytophthora capsici</i>    | 40476                | Chili pepper              | KACC                                      |
| <i>Phytophthora sojae</i>      | 40412                | Soy bean                  | KACC                                      |
| <i>Phytophthora sojae</i>      | 40468                | Soy bean                  | KACC                                      |
| <i>Phytophthora sojae</i>      | 48989                | Soy bean                  | KACC                                      |

a) KACC: Korean Agricultural Culture Collection, <https://genebank.rda.go.kr/eng/uat/uia/actionMain.do>

**Supplementary Table 4.** *Solanum* NLRs used for the functional validations

| <b>Gene</b>     | <b>Promoter/terminator</b> | <b>Reference*</b> | <b><i>Solanum</i> species</b> |
|-----------------|----------------------------|-------------------|-------------------------------|
| <i>R1</i>       | p35s / tNOS                | 35                | <i>S. demissum</i>            |
| <i>R2</i>       | p35s / tNOS                | 36                | <i>S. demissum</i>            |
| <i>R3a</i>      | Native elements            | 37                | <i>S. demissum</i>            |
| <i>R8</i>       | Native elements            | 38                | <i>S. demissum</i>            |
| <i>Rpi-amr1</i> | p35s / tNOS                | 39                | <i>S. americanum</i>          |
| <i>Rpi-blb1</i> | p35s / tNOS                | 40                | <i>S. bulbocastanum</i>       |
| <i>Rpi-blb2</i> | Native elements            | 41                | <i>S. bulbocastanum</i>       |
| <i>Rpi-vnt1</i> | p35s / tNOS                | 42                | <i>S. venturii</i>            |

\*reference in manuscript
