# Supplementary material for: Conserved effector families render Phytophthora species vulnerable to recognition by NLR receptors in nonhost plants
Source: PubMed Central journal article supplement — Nat Commun. 2024 Nov 20;15:10070. doi: 10.1038/s41467-024-54452-2 (PMC11579510; doi:10.1038/s41467-024-54452-2), 2024-11-20
Supplement: 41467_2024_54452_MOESM3_ESM.pdf [file 41467_2024_54452_MOESM3_ESM.pdf]

**Description of Additional supplementary files**

**Supplementary Data 1.** Classification of homologous effectors used in this study.

**Supplementary Data 2.** Cloned effector homologs of Phytophthora spp.

**Supplementary Data 3.** Construct information for generating transgenic plants and cloning of NLRs / effectors

**Supplementary Data 4.** Individual P vales
